# Supplementary material for: Transition-metal catalyst free CN coupling with phenol/phenoxide: a green synthesis of a benzoxazole scaffold by an anodic oxidation reaction
Source: Royal Society of Chemistry journal article supplement (doi:10.1039/c3ra00128h), 2013-01-01

# **Transition-Metal Catalyst Free C=N Coupling with Phenol / Phenoxide: Green Synthesis of Benzoxazole Scaffold by Anodic Oxidation Reaction**

Yachen Shih, Chengyi Ke, Chinghao Pan and Yungtzung Huang\*

Department of Applied Chemistry, National University of Kaohsiung

No. 700, Kaohsiung University Rd., Kaohsiung 81148, Taiwan, R.O.C.

*Corresponding Author, Phone: 886-7-591-9418; Fax: 886-7-591-9348; Email: ythuang@nuk.edu.tw*

## **Supplementary Information**

## TABLE OF CONTENTS

### I. NMR spectra:

1.  $^1\text{H}$ -NMR spectrum of phenolic Schiff base (**2**) S-3
2.  $^{13}\text{C}$ -NMR spectrum of phenolic Schiff base (**2**) S-4
3.  $^1\text{H}$ -NMR spectrum of benzoxazole (**1**) S-5
4.  $^{13}\text{C}$ -NMR spectrum of benzoxazole (**1**) S-6

### II. CV spectra:

1. CV spectrum of blank test S-7
2. CV spectrum of  $\text{LiClO}_4$  in  $\text{CH}_3\text{CN}$  S-8
3. CV spectrum of  $\text{LiOCH}_3$  in  $\text{CH}_3\text{CN}$  S-9
4. CV spectrum of 2,6-lutidine in  $\text{CH}_3\text{CN}$  S-10
5. CV spectrum of phenol in  $\text{CH}_3\text{CN}$  S-11
6. CV spectrum of phenol in  $\text{CH}_3\text{OH}$  S-12
7. CV spectrum of Schiff base (**11**) in  $\text{CH}_3\text{CN}$  S-13
8. CV spectrum of Schiff base (**11**) in  $\text{CH}_3\text{OH}$  S-14
9. CV spectrum of phenolic Schiff base (**2**) in  $\text{CH}_3\text{CN}$  S-15
10. CV spectrum of phenolic Schiff base (**2**) in  $\text{CH}_3\text{OH}$  S-16
11. CV spectrum of lithium phenolate in  $\text{CH}_3\text{CN}$  S-17
12. CV spectrum of phenolate Schiff base (**7**) in  $\text{CH}_3\text{CN}$  S-18

## I. NMR spectra:

1.  $^1\text{H}$ -NMR spectrum of phenolic Schiff base (**2**):

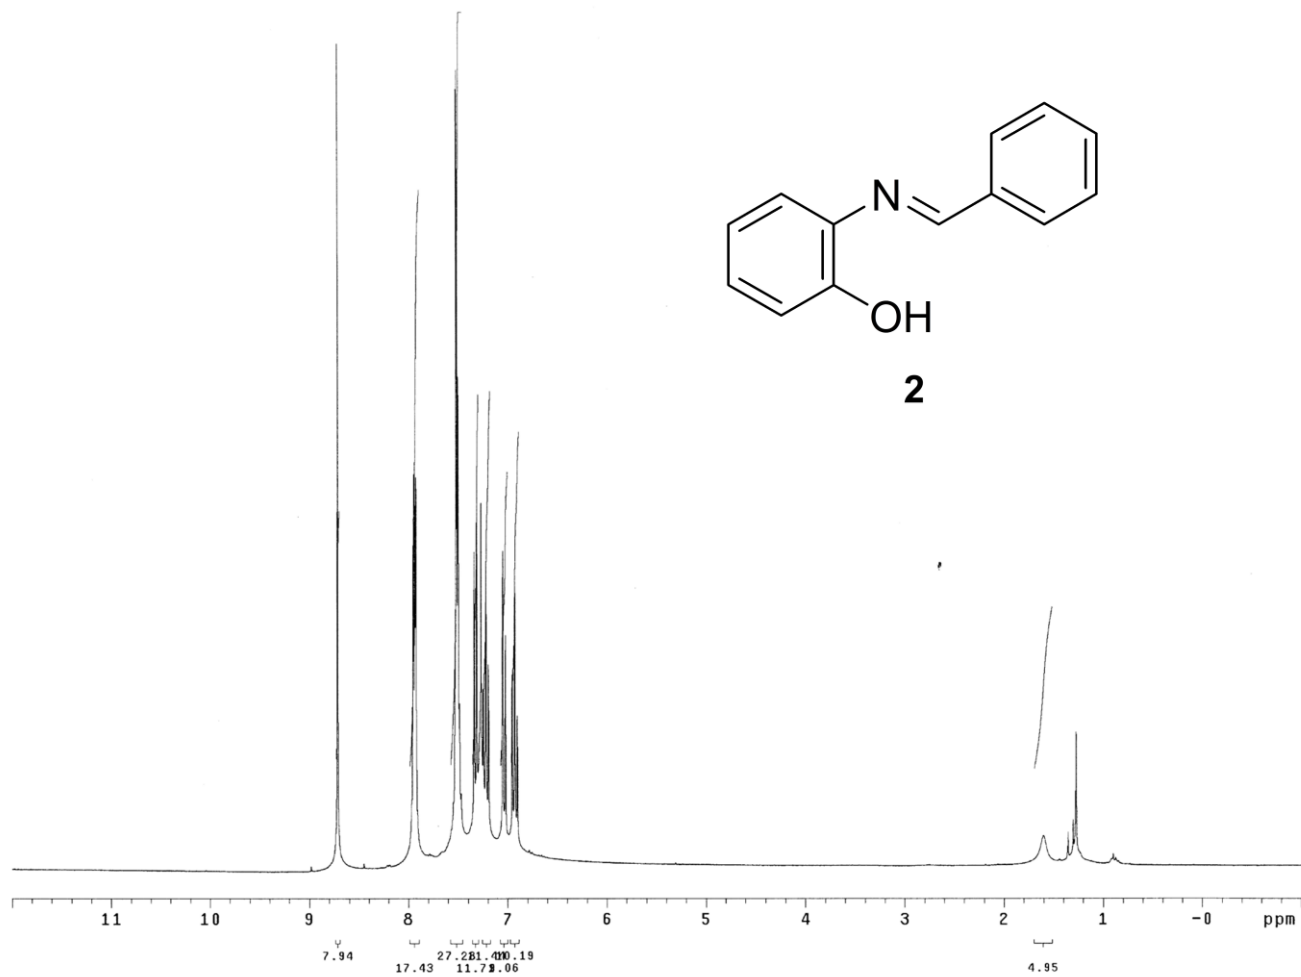

2.  $^{13}\text{C}$ -NMR spectrum of phenolic Schiff base (**2**):

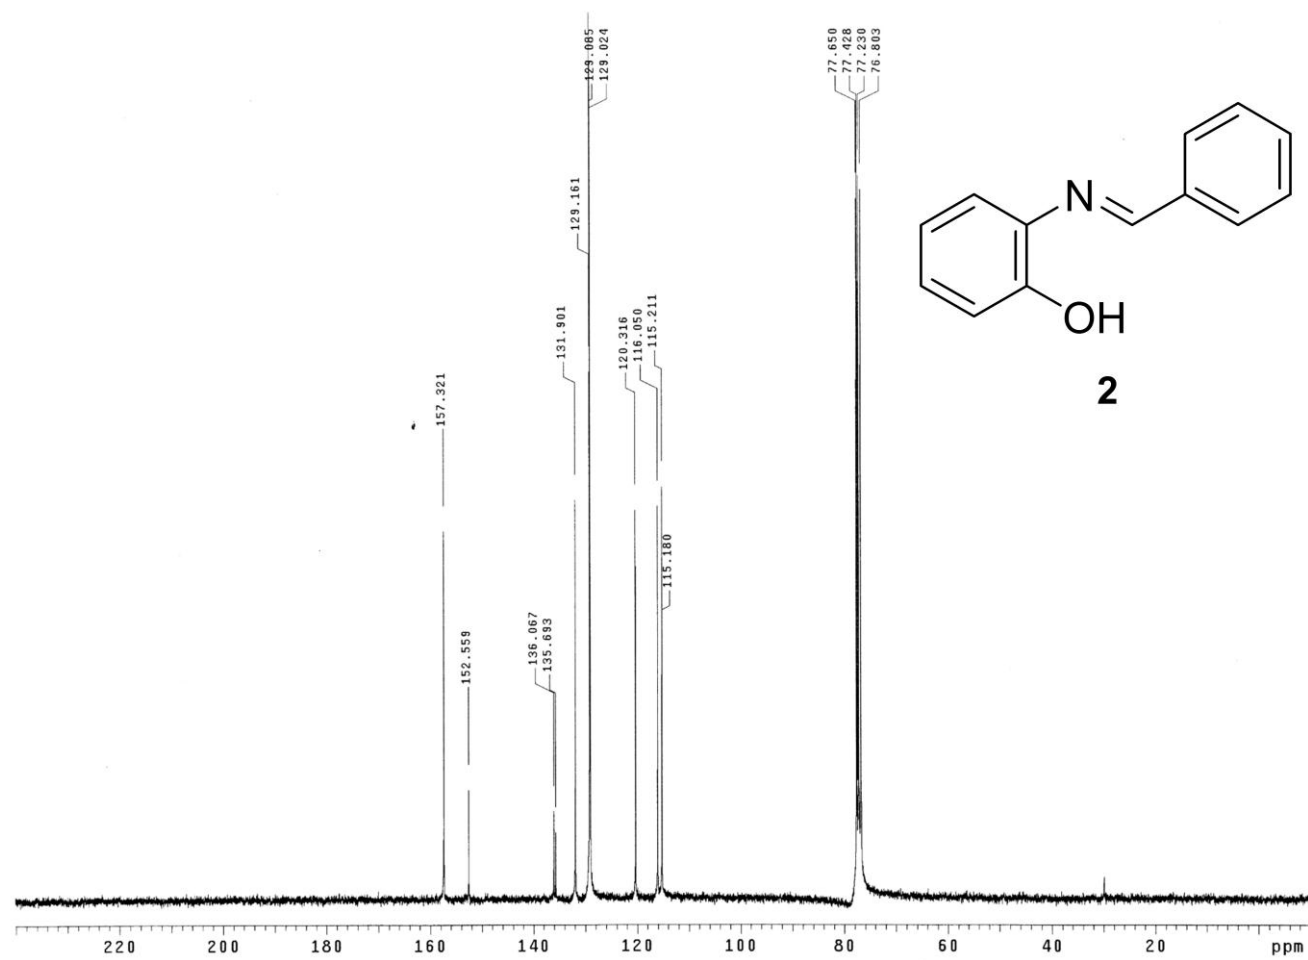

3.  $^1\text{H-NMR}$  spectrum of benzoxazole (**1**):

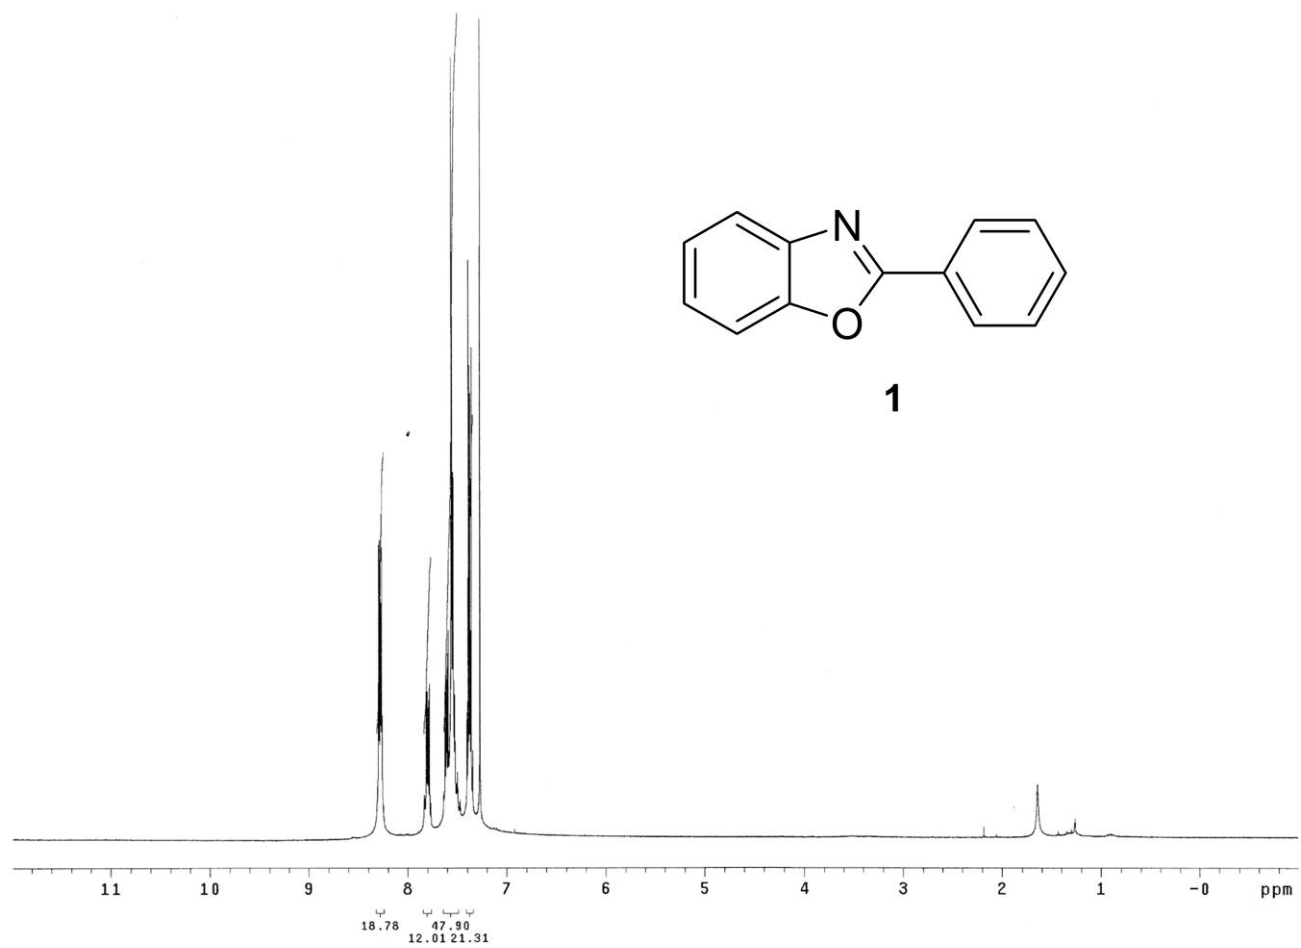

4.  $^{13}\text{C}$ -NMR spectrum of benzoxazole (**1**):

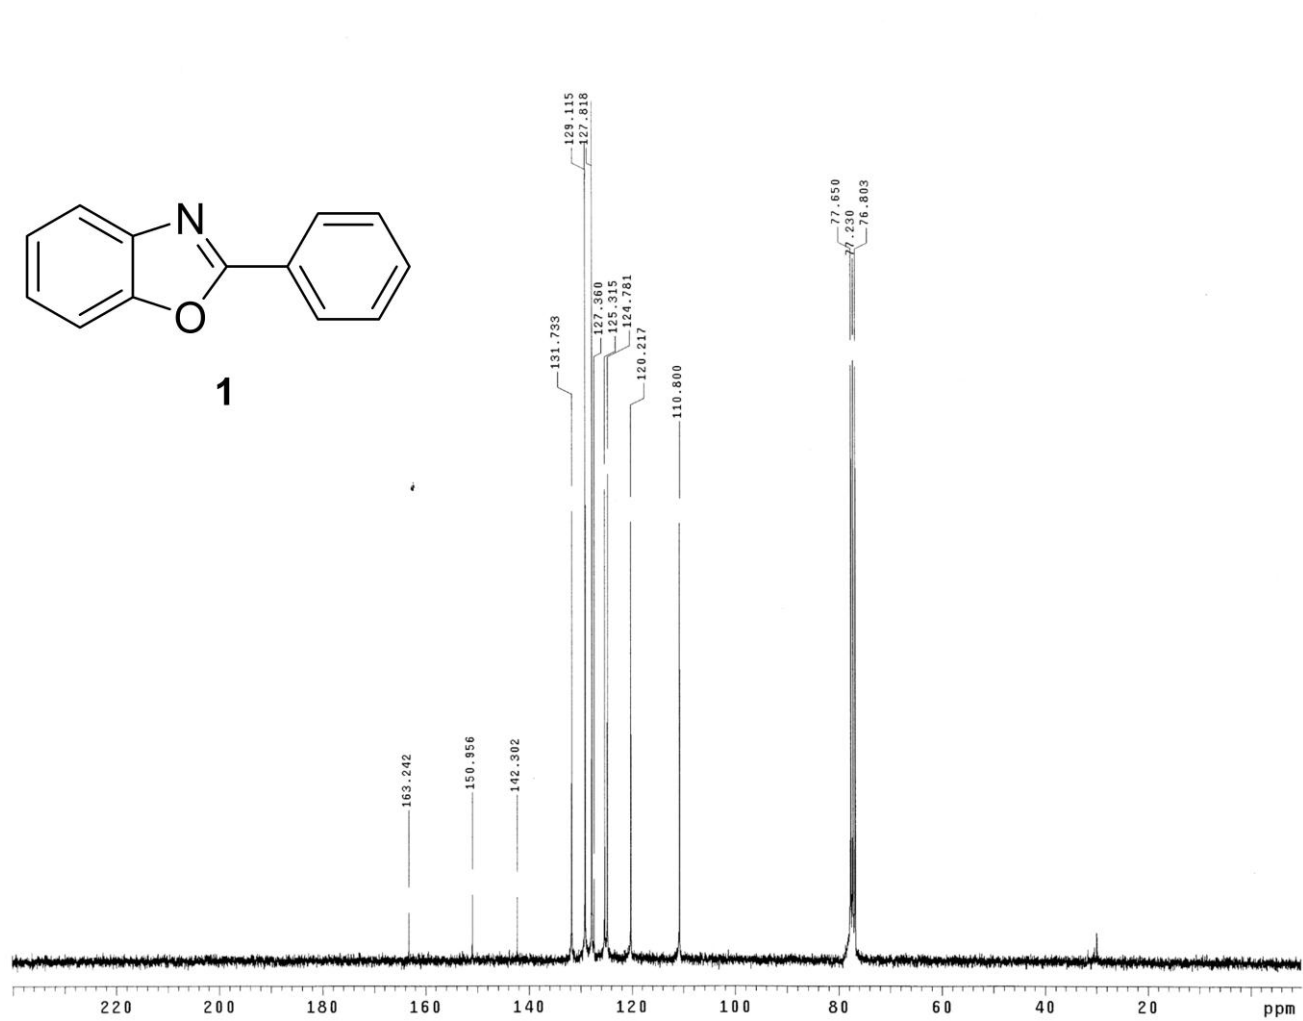

## II. CV spectra:

### 1. CV spectrum of blank test:

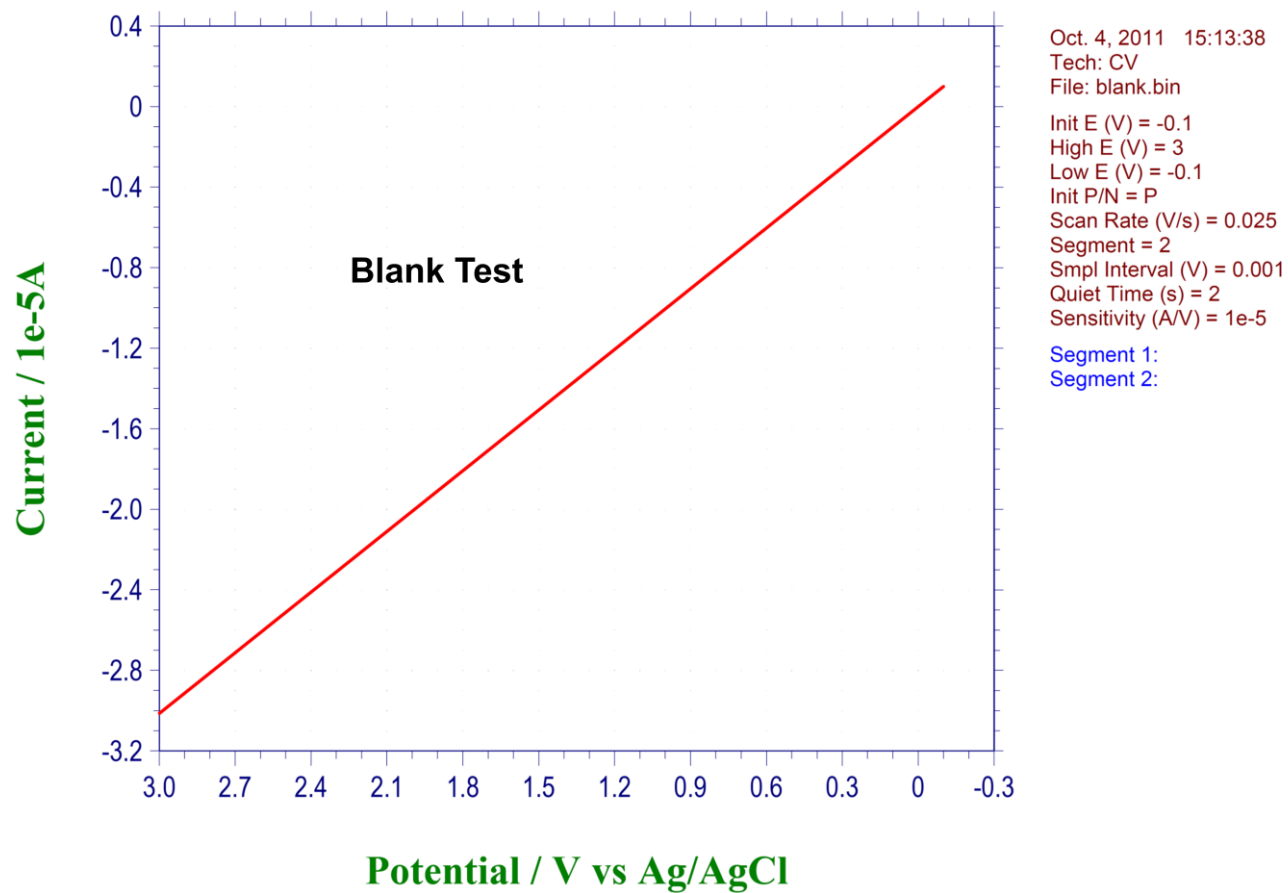

2. CV spectrum of  $\text{LiClO}_4$  in  $\text{CH}_3\text{CN}$ :

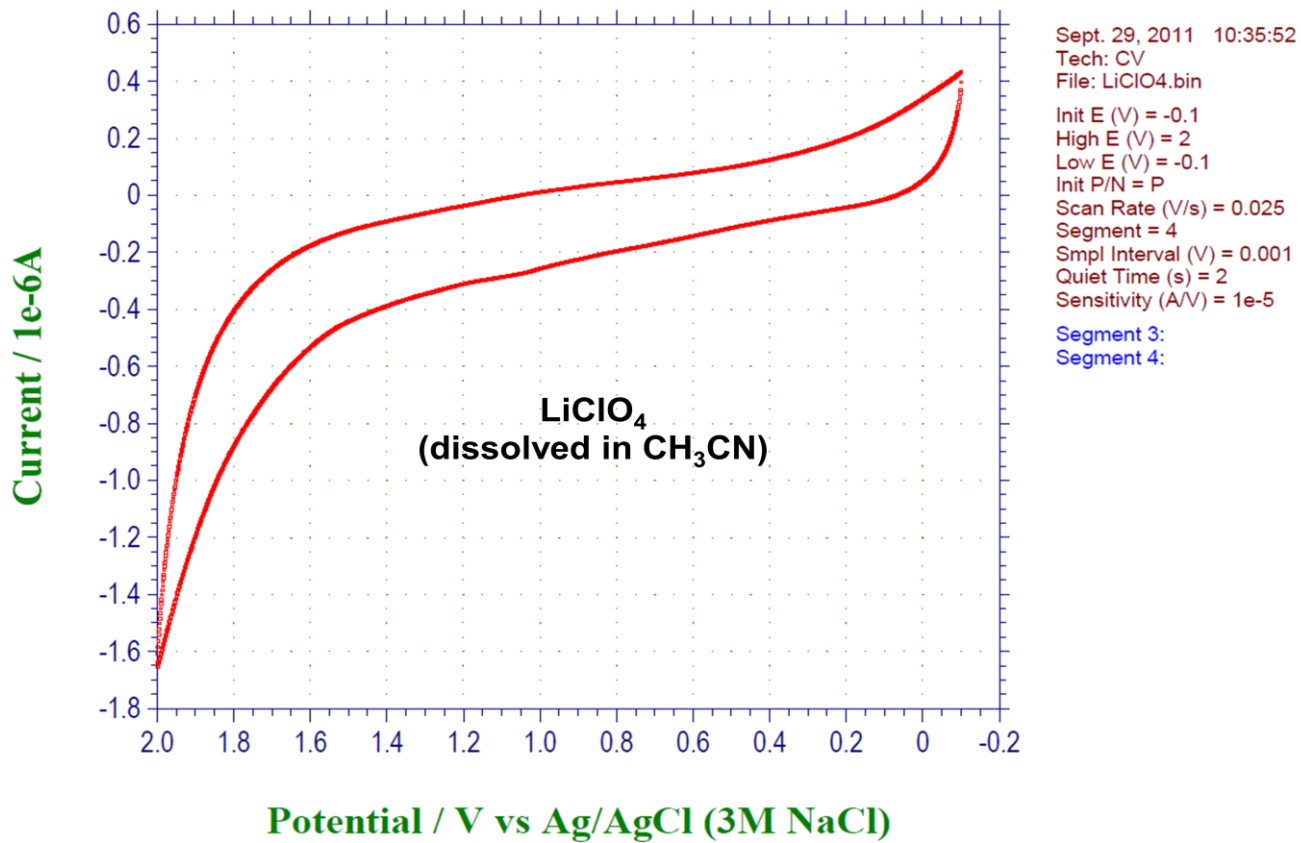



3. CV spectrum of LiOCH<sub>3</sub> in CH<sub>3</sub>CN:

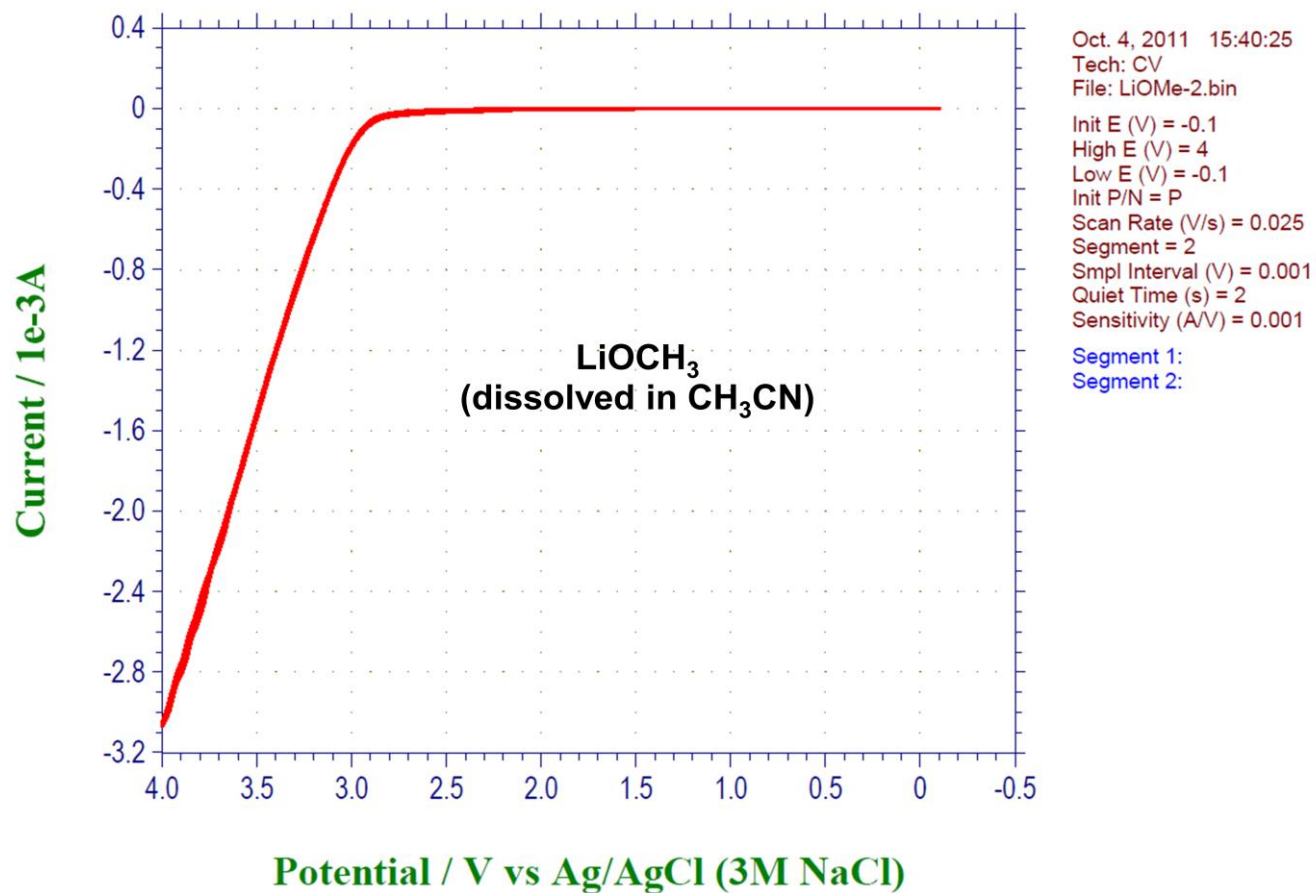

4. CV spectrum of 2,6-lutidine in CH<sub>3</sub>CN:

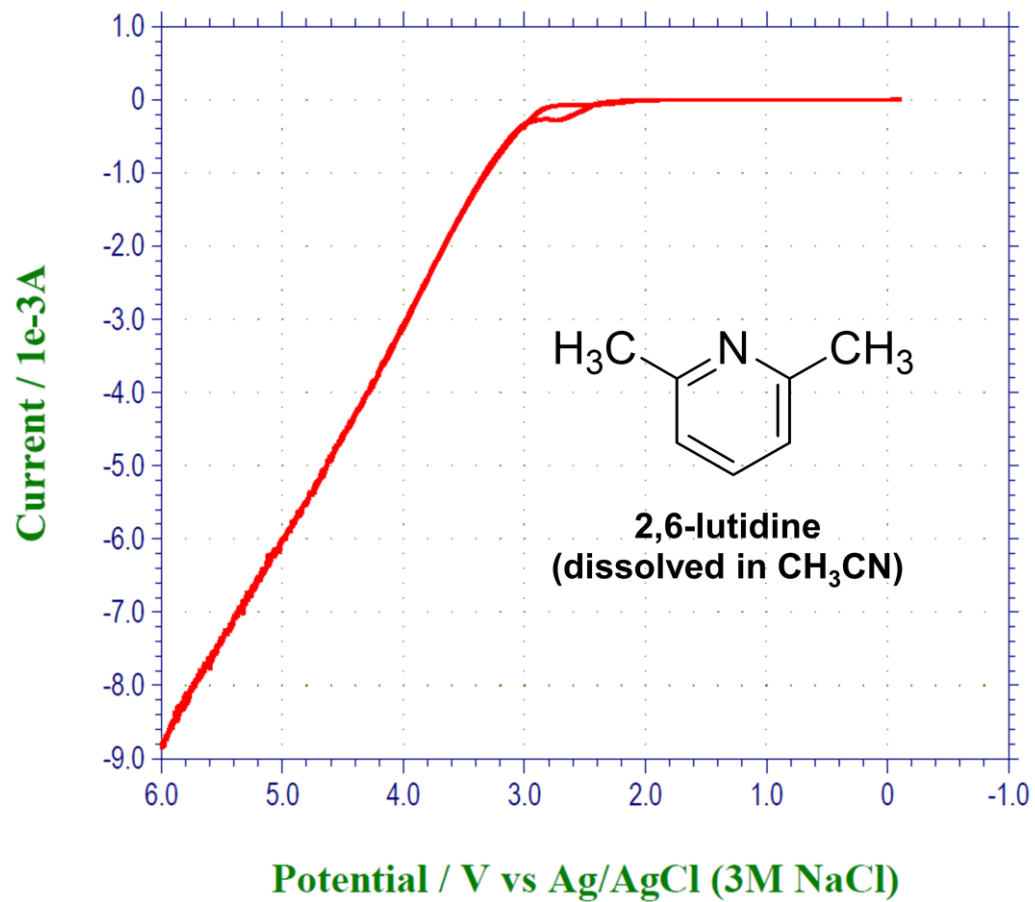

Sept. 29, 2011 17:15:06

Tech: CV

File: 2,6-lutidine-1-2.bin

Init E (V) = -0.1

High E (V) = 6

Low E (V) = -0.1

Init P/N = P

Scan Rate (V/s) = 0.025

Segment = 2

Smpl Interval (V) = 0.001

Quiet Time (s) = 2

Sensitivity (A/V) = 0.001

Segment 1:

Segment 2:

5. CV spectrum of phenol in CH<sub>3</sub>CN:

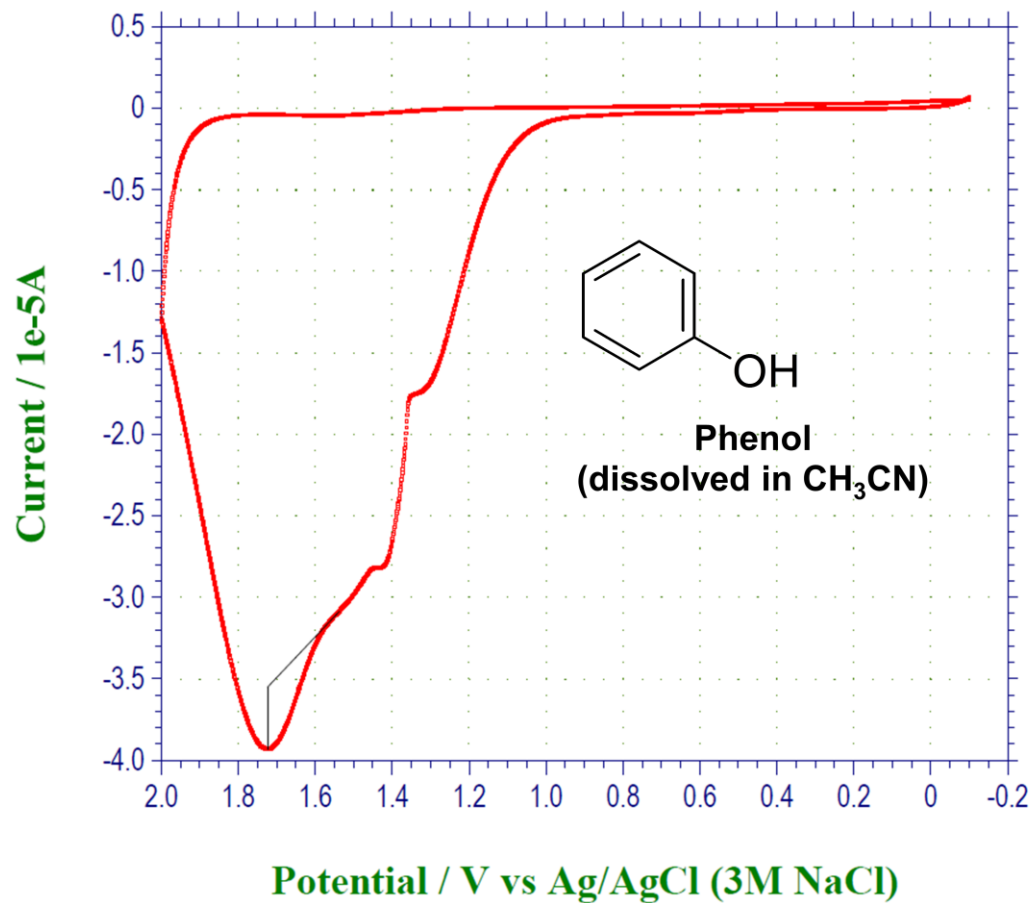

Sept. 29, 2011 16:53:06

Tech: CV

File: phenol-5-1.bin

Init E (V) = -0.1

High E (V) = 2

Low E (V) = -0.1

Init P/N = P

Scan Rate (V/s) = 0.025

Segment = 2

Smpl Interval (V) = 0.001

Quiet Time (s) = 2

Sensitivity (A/V) = 1e-5

Segment 1:

Ep = 1.724V

ip = -3.798e-6A

Ah = -1.380e-5C

Segment 2:

6. CV spectrum of phenol in CH<sub>3</sub>OH:

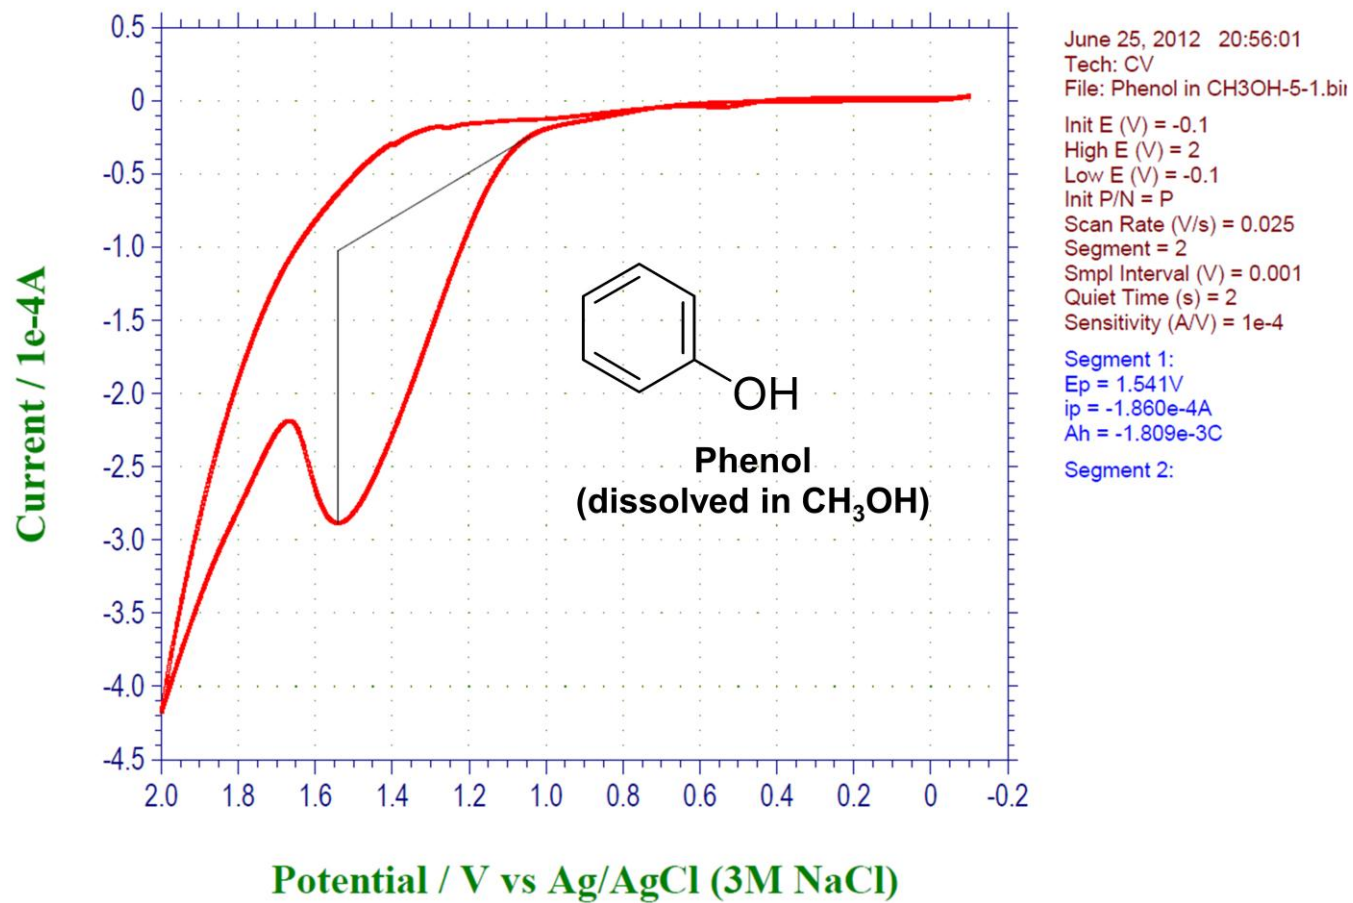

7. CV spectrum of imine (9) in CH<sub>3</sub>CN:

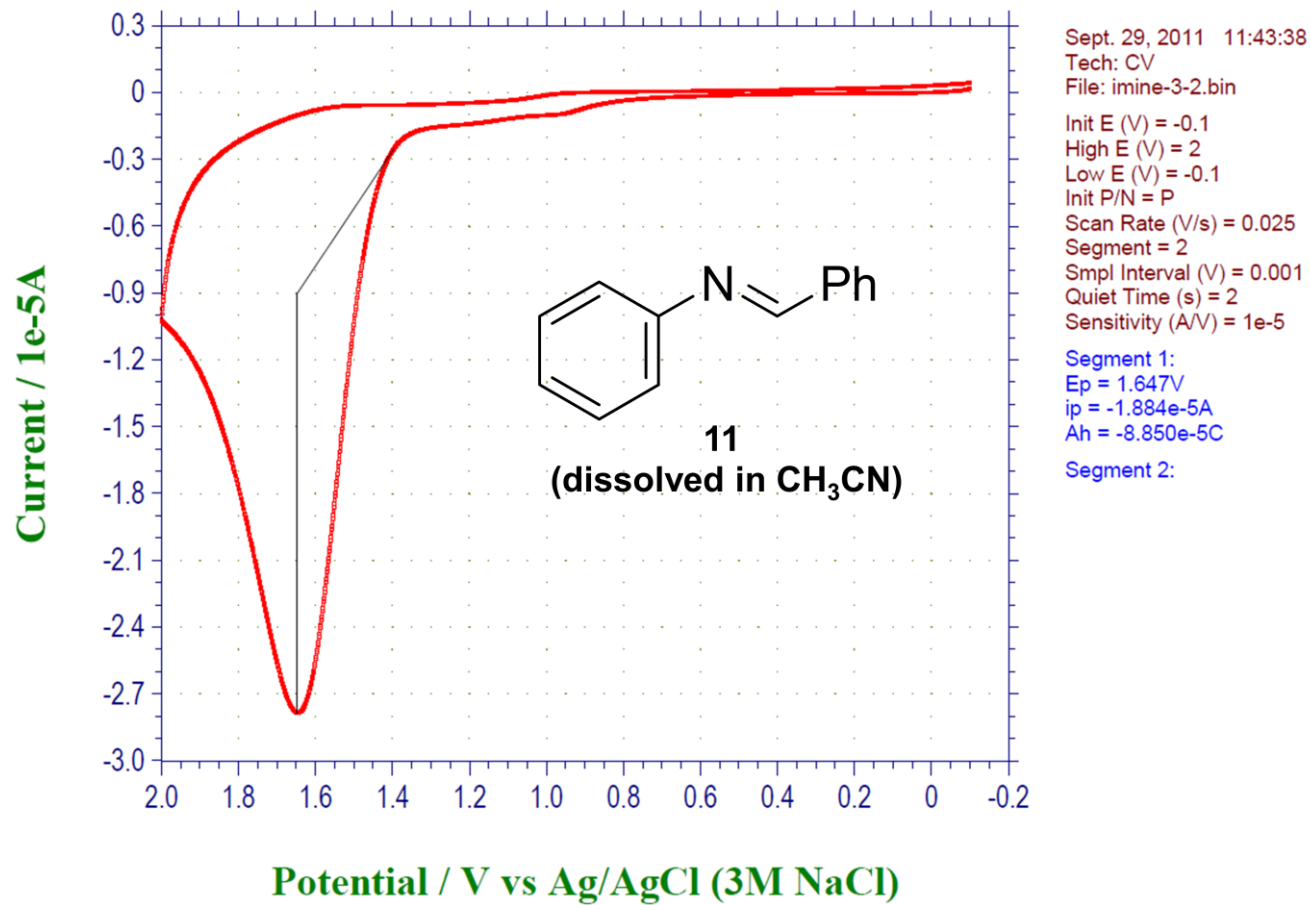

8. CV spectrum of imine (9) in CH<sub>3</sub>OH:

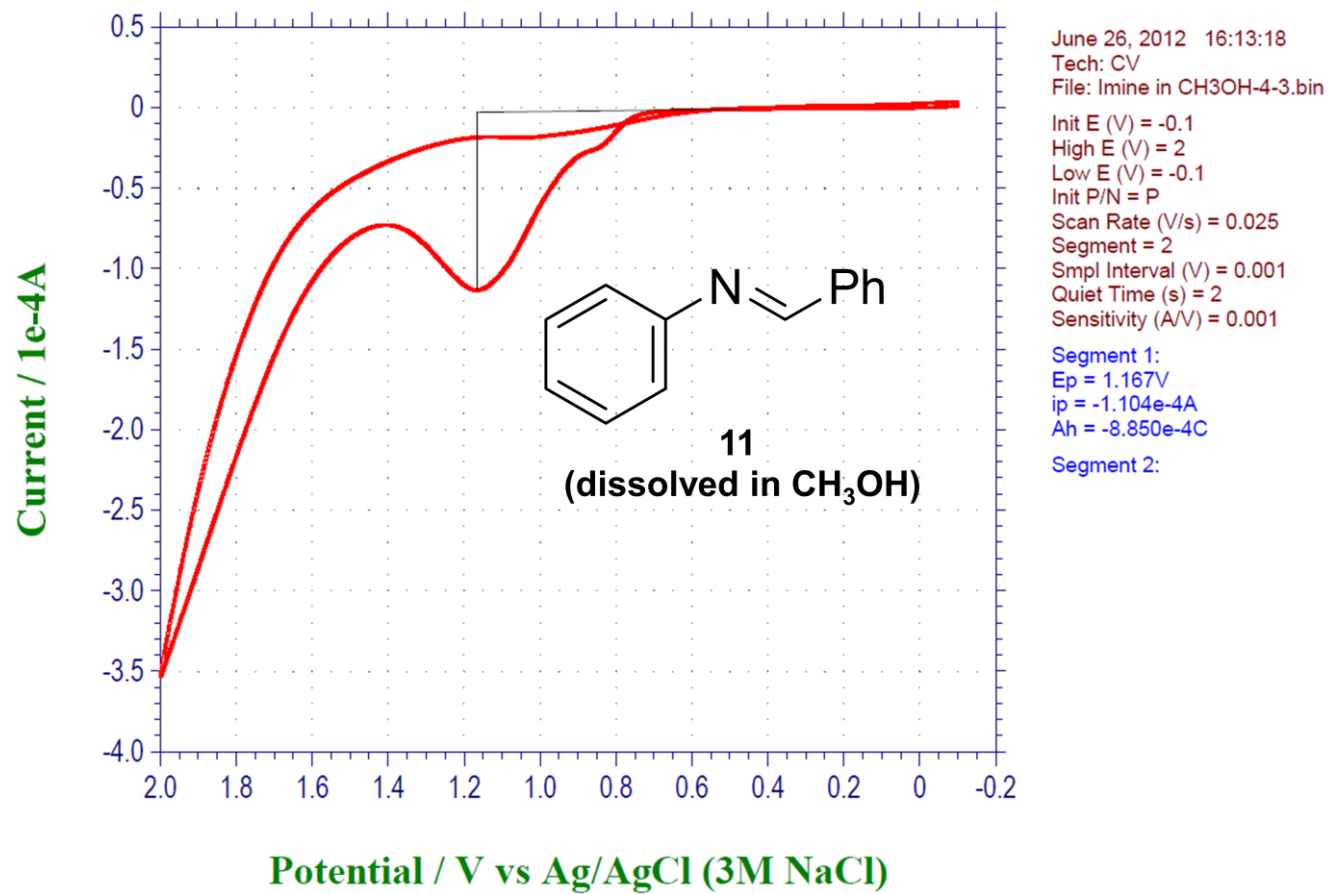

9. CV spectrum of phenolic Schiff base (**2**) in CH<sub>3</sub>CN:

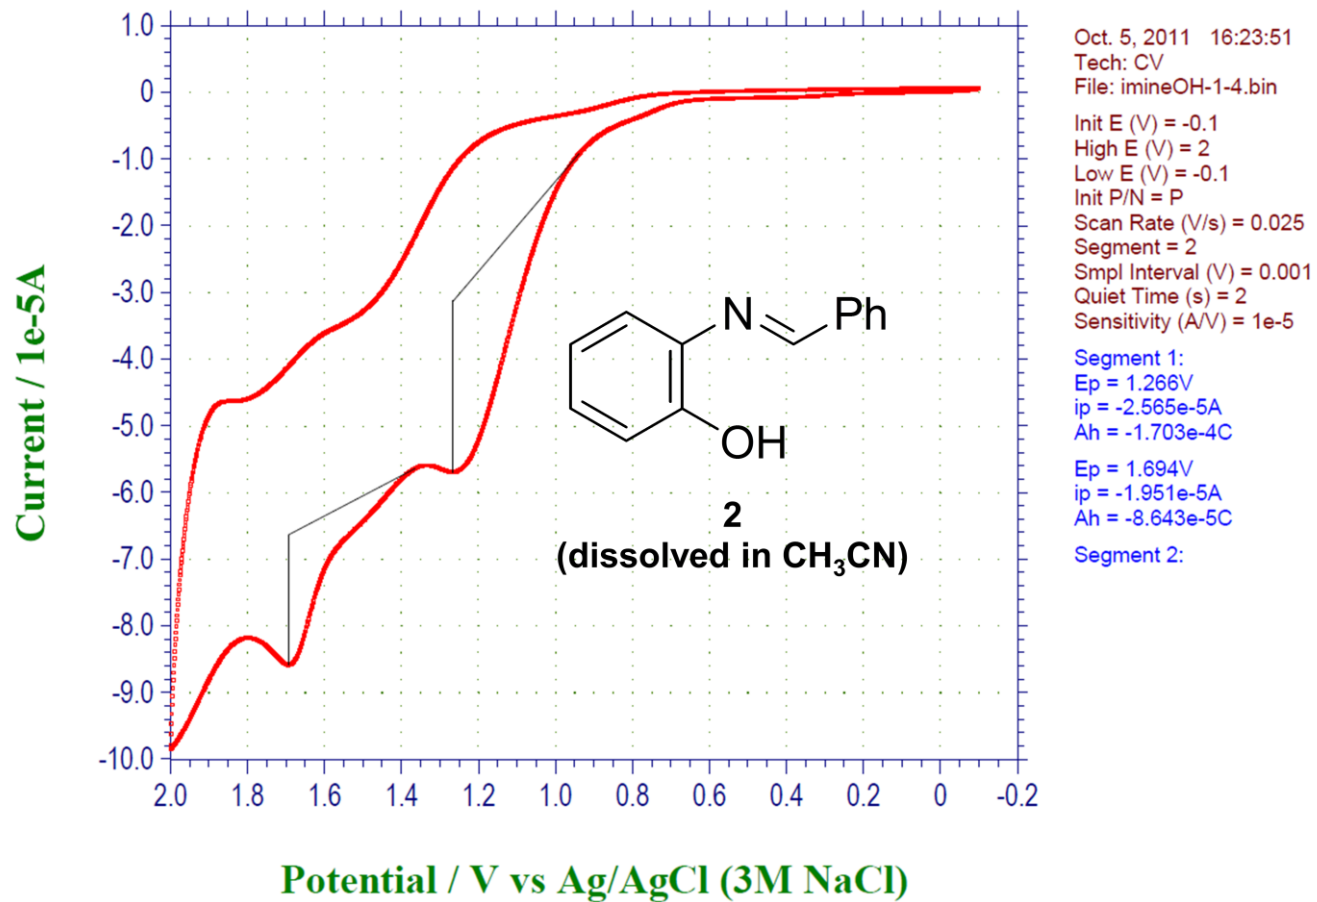

10. CV spectrum of phenolic Schiff base (**2**) in CH<sub>3</sub>OH:

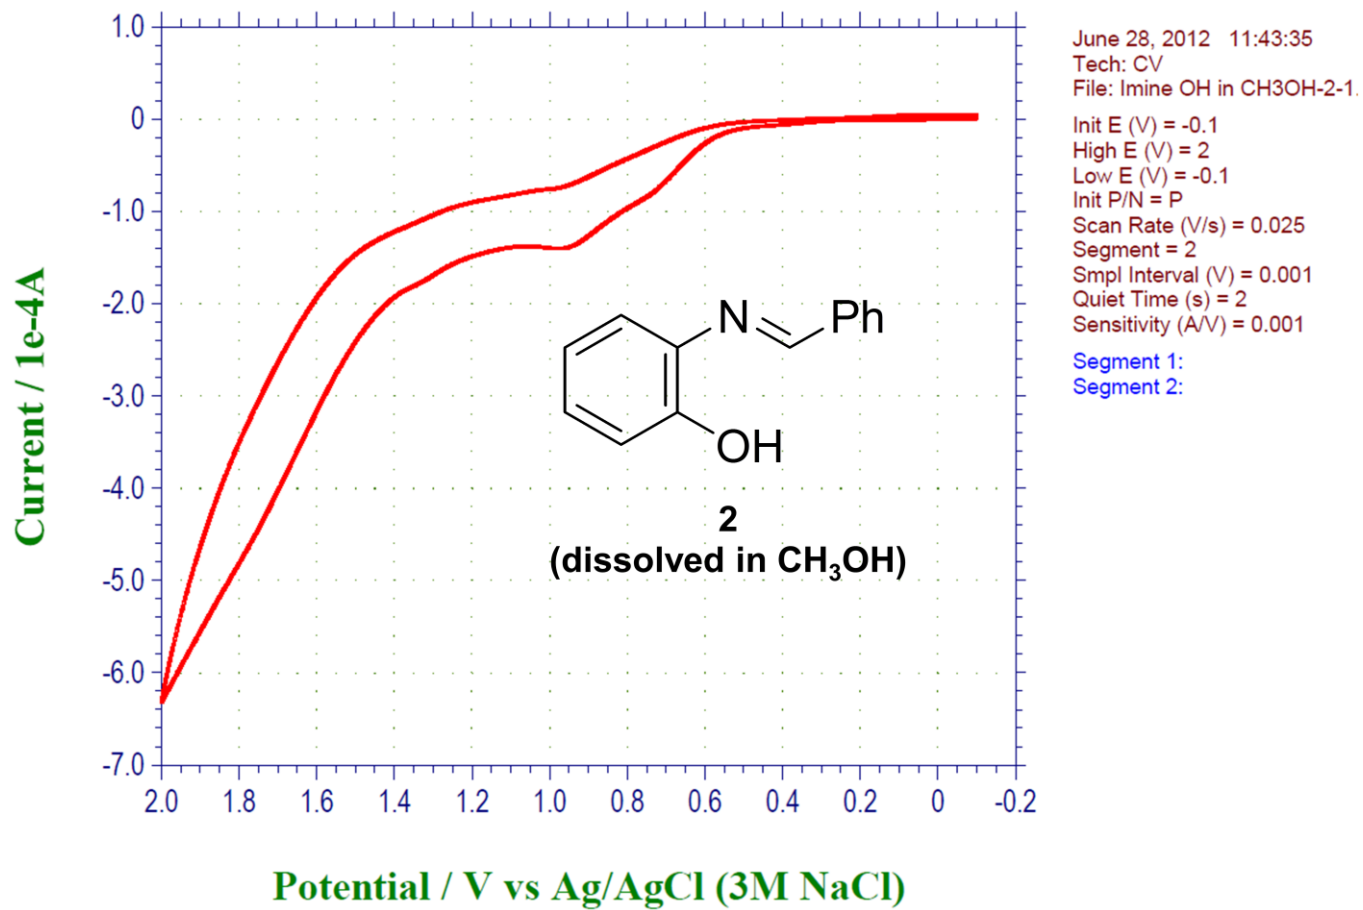



11. CV spectrum of lithium phenolate in CH<sub>3</sub>CN:

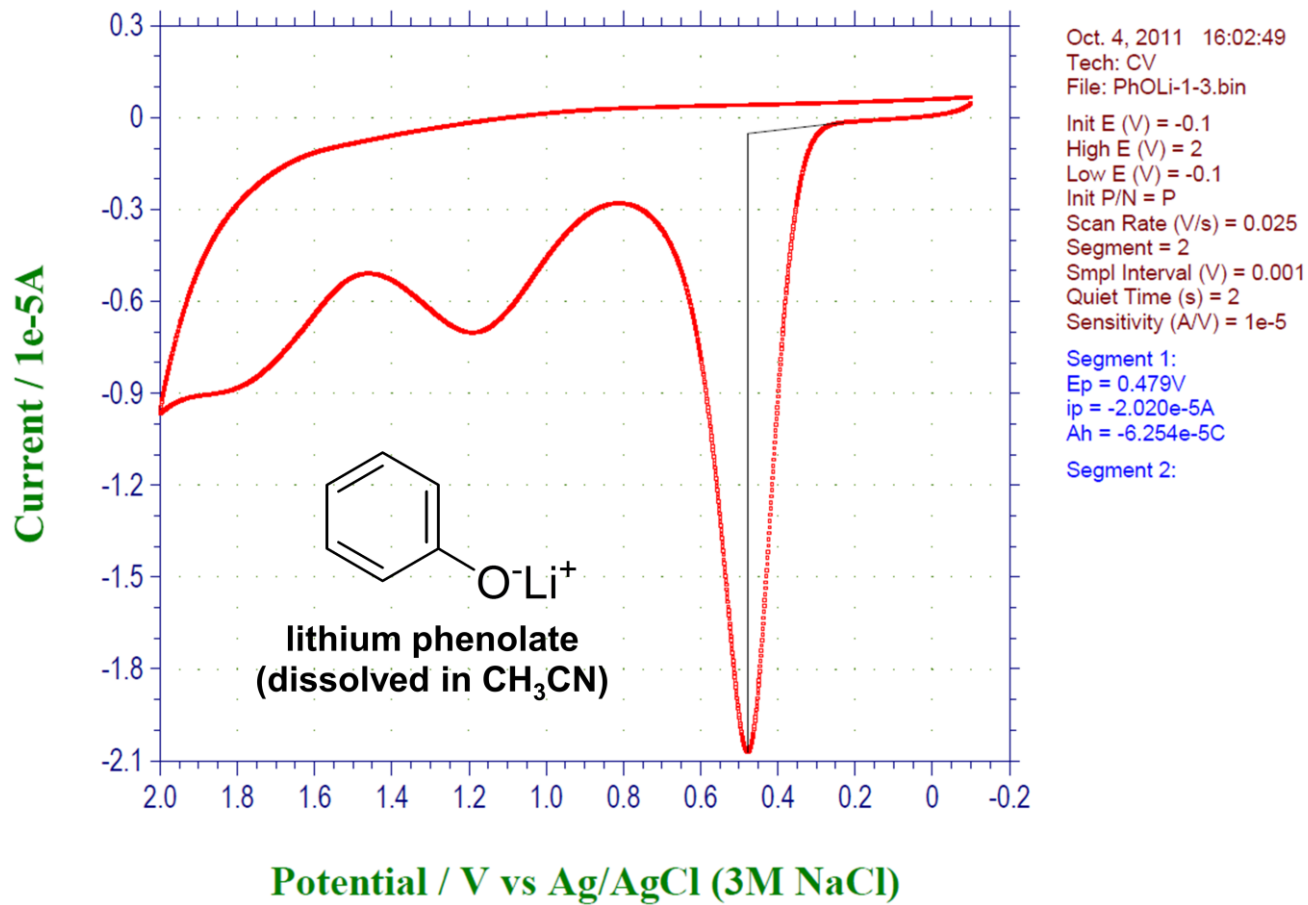

12. CV spectrum of phenolate Schiff base (**7**) in CH<sub>3</sub>CN:

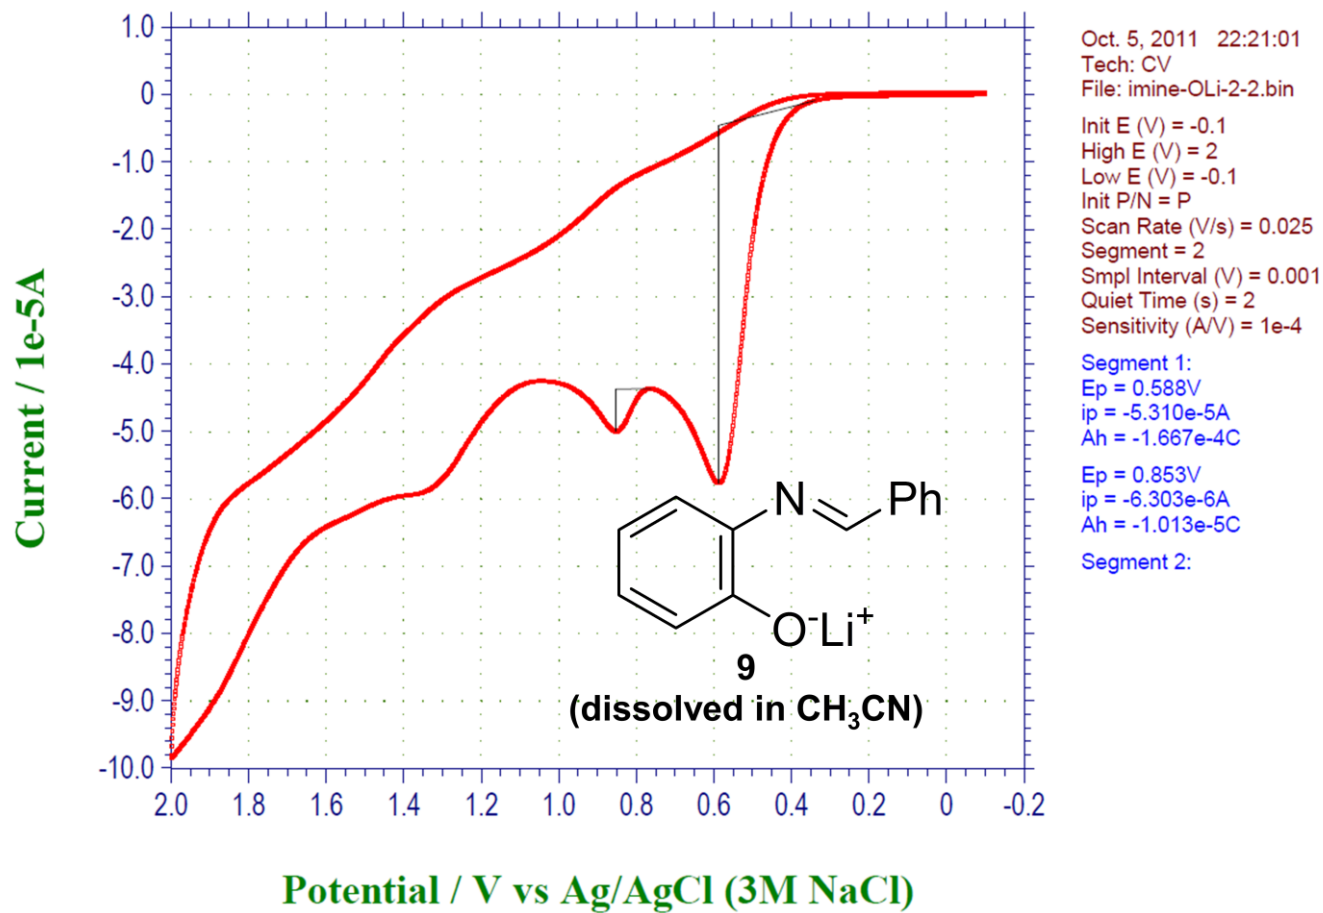

Supplement: c3ra00128h.pdf [file c3ra00128h.pdf]
